# Supplementary material
Source: publisher figshare collection journal article supplement (https://acs.figshare.com/ndownloader/files/22801208)
Supplement: Supplementary file 1 [file 22801208]

Supporting Information for

**Oxidative Catalytic Cracking and Reforming of Coal Pyrolysis Volatiles over**

**NiO**

Dechao Wang, Lijun Jin, Baoyong Wei, Jiannan Lv, Yang Li, Haoquan Hu\*

State Key Laboratory of Fine Chemistry, Institute of Coal Chemical Engineering, School of  
Chemical Engineering, Dalian University of Technology, Dalian 116024, China

---

\* Corresponding author. Tel. & Fax: +86-411-84986157 E-mail: [hhu@dlut.edu.cn](mailto:hhu@dlut.edu.cn) (Haoquan Hu)

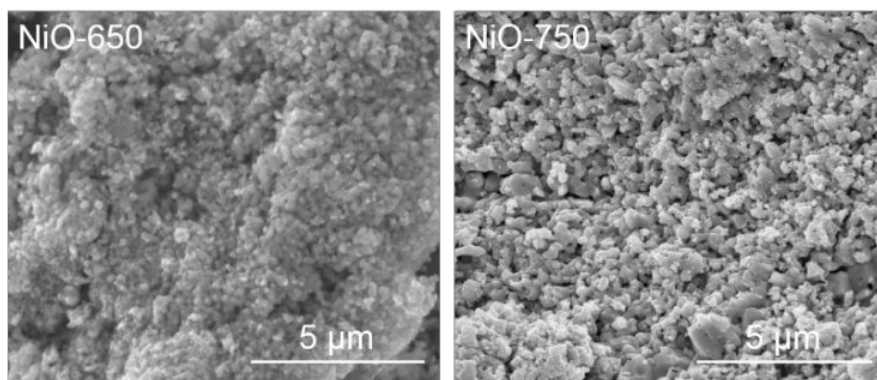

**Fig S1.** SEM images of NiO-650 and NiO-750

Small particles can be observed on NiO-650 and NiO-750 samples. The sintering and agglomeration of particles on NiO-750 is obvious than NiO-650.
